# Supplementary material for: HDAC7 inhibits cell proliferation via NudCD1/GGH axis in triple-negative breast cancer
Source: PubMed Central journal article supplement — Oncol Lett. 2022 Dec 5;25(1):33. doi: 10.3892/ol.2022.13619 (PMC9773322; doi:10.3892/ol.2022.13619), 2022-12-05

Figure S1. Expression and prognostic value of other HDACs in METABRIC and TCGA databases. (A) Expression of HDAC5/8/9 in TNBC and non-TNBC tissue was similar in METABRIC database ( $P>0.05$ ). (B) HDAC1-6, HDAC8 and HDAC10-11 were not statistically associated with prognosis in TNBC in TCGA database. (C) HDAC1-4, HDAC8 and HDAC11 were not statistically associated with prognosis in TNBC in the METABRIC database. HDACs, histone deacetylases; TNBC, triple-negative breast cancer; TCGA, The Cancer Genome Atlas.

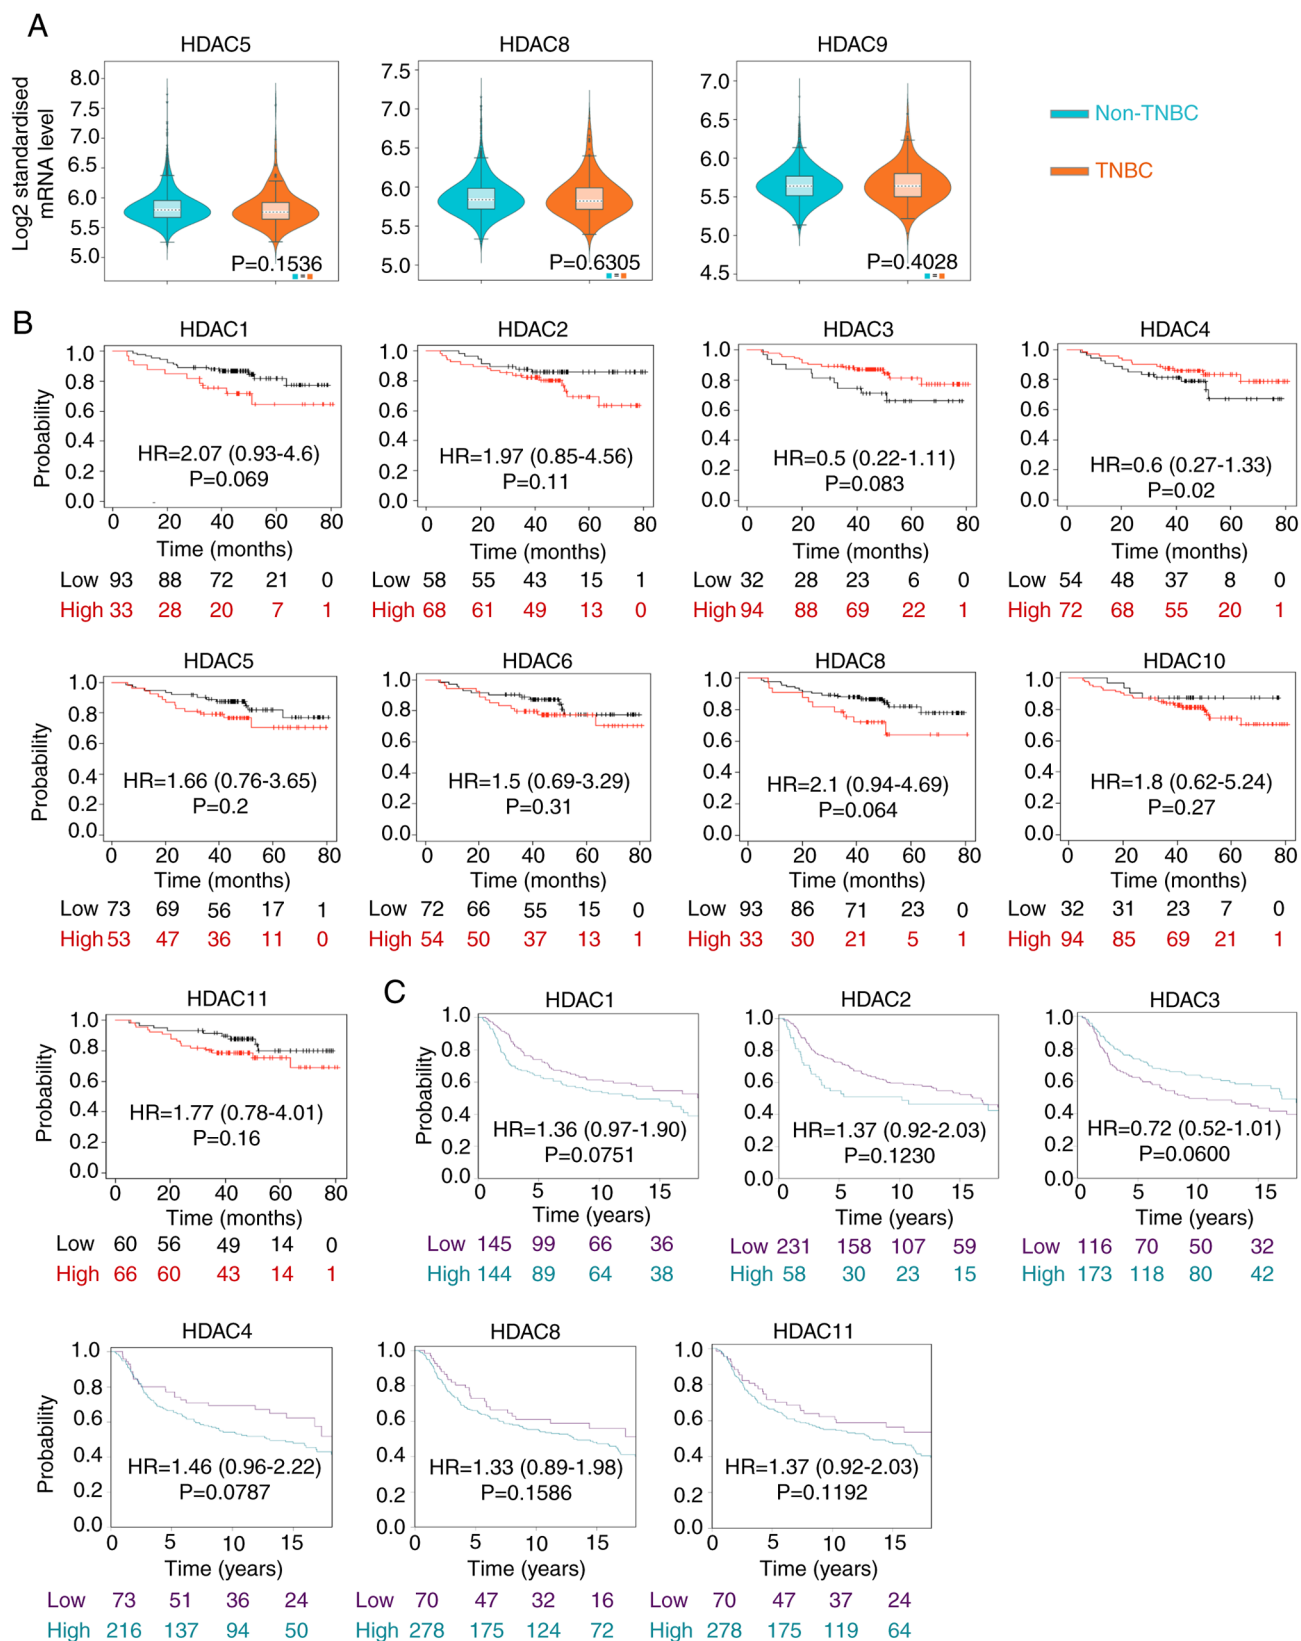

Figure S2. Prognostic value of C3orf36, LRRCC1, CHAF1B, CDCA2, ESRP1, MSH2 and XYLB in TCGA and METABRIC databases. (A) C3orf36, LRRCC1, CHAF1B, CDCA2, ESRP1, MSH2 and XYLB were not statistically associated with prognosis in TNBC in the TCGA database. (B) C3orf36, LRRCC1, CHAF1B, CDCA2, ESRP1 and XYLB were not statistically associated with prognosis in TNBC in the METABRIC database. TNBC, triple-negative breast cancer; TCGA, The Cancer Genome Atlas.

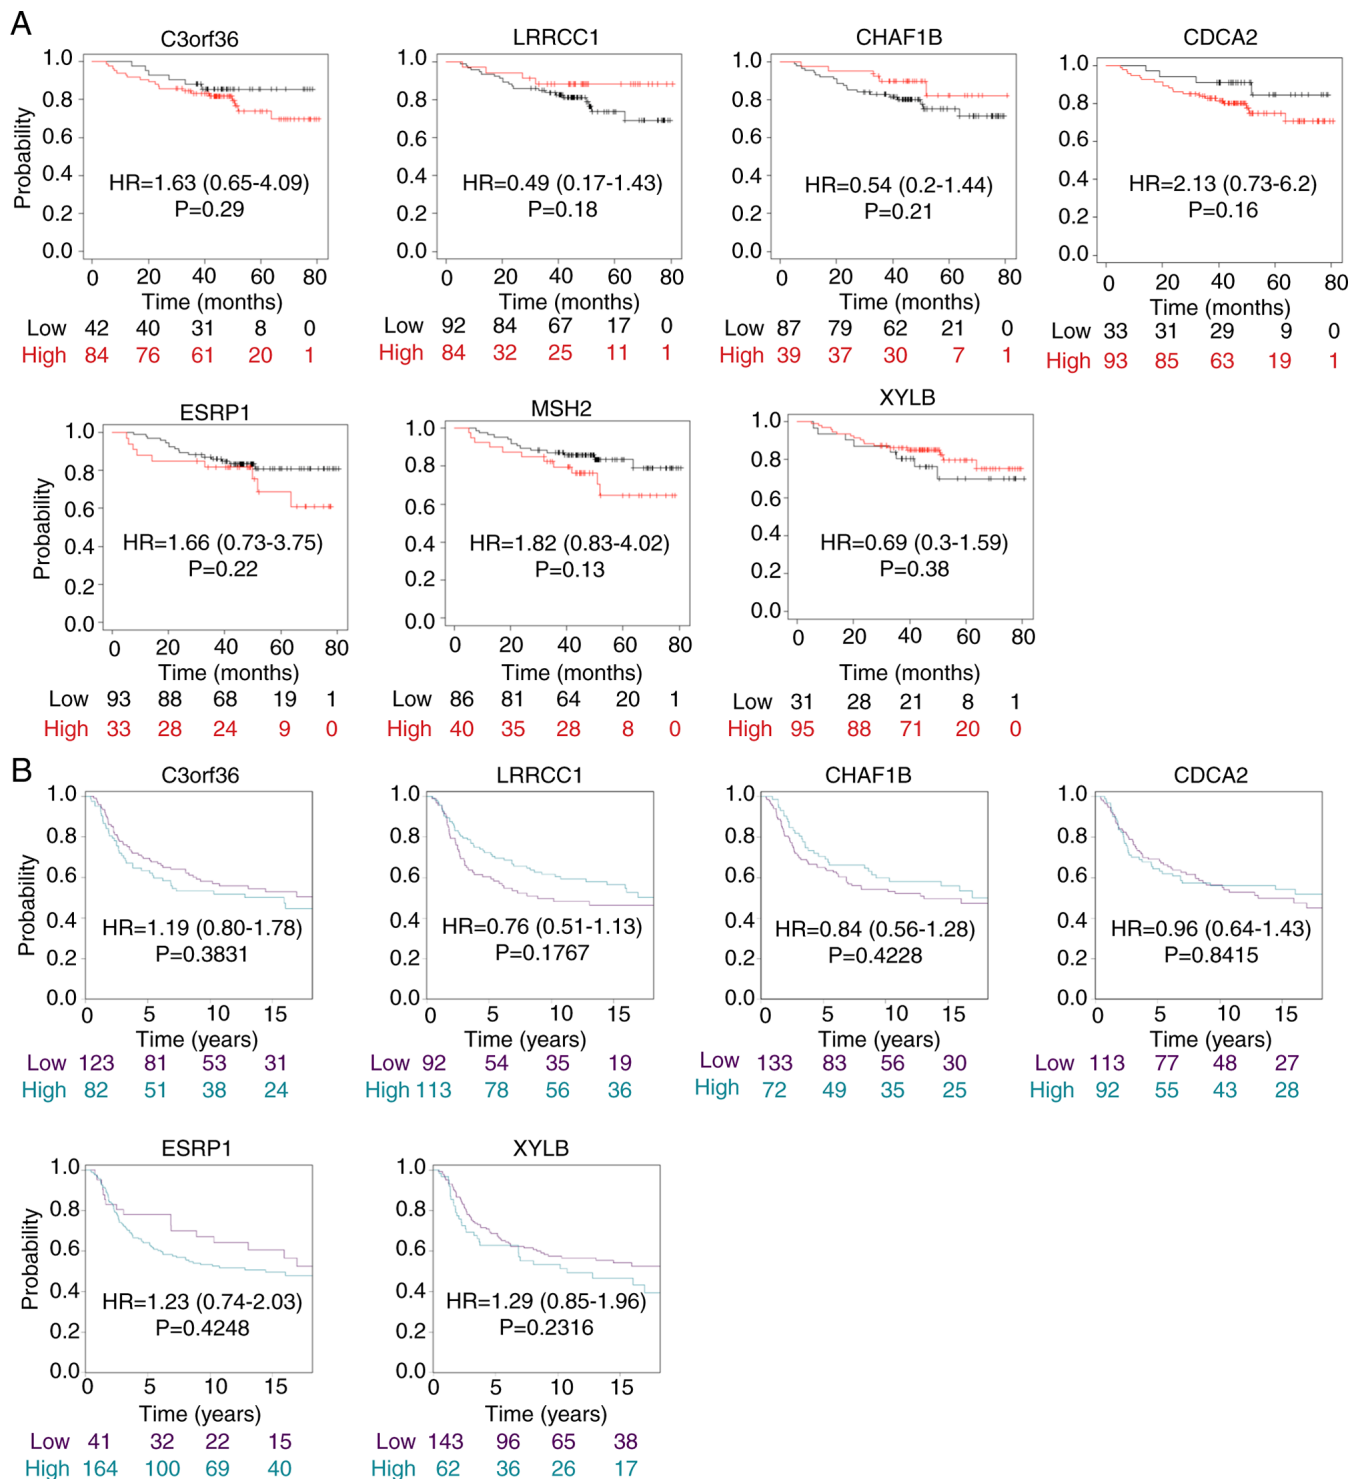

Supplement: Supplementary_Data.pdf [file Supplementary_Data.pdf]
